# Supplementary material
Source: PubMed Central journal article supplement (PMC1347999)

scFv:

2

9

7

200—

127—

85—

— CD19

— CD200

41—

32—

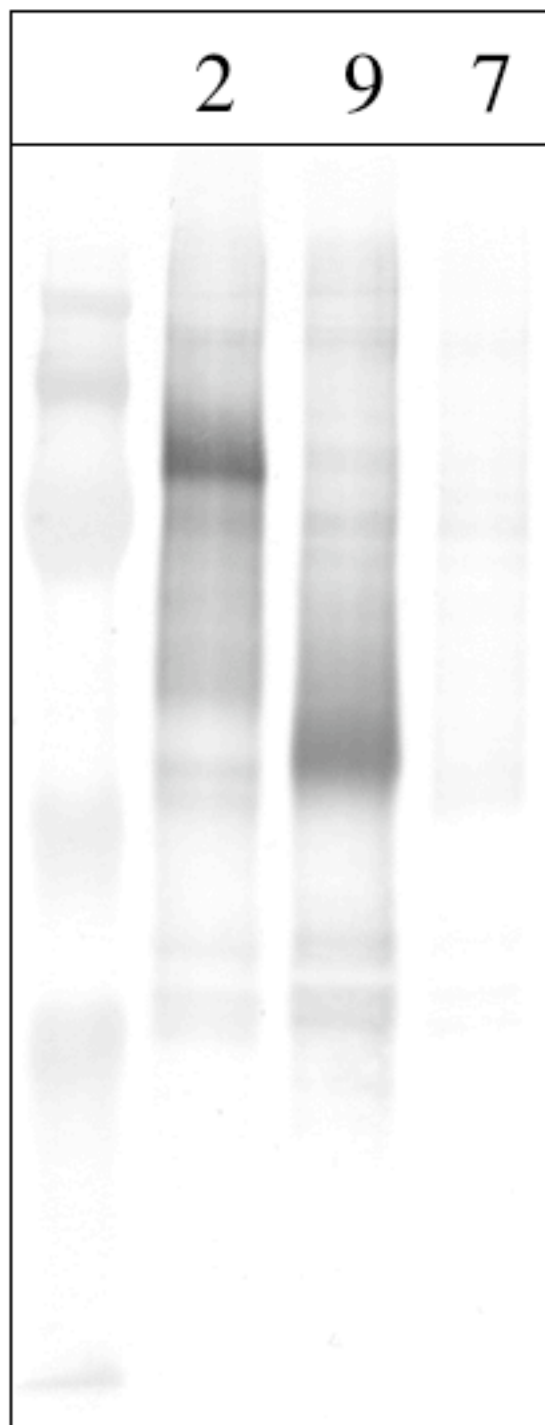

Supplement: pnas_0510081103_1.pdf [file pnas_0510081103_1.pdf]

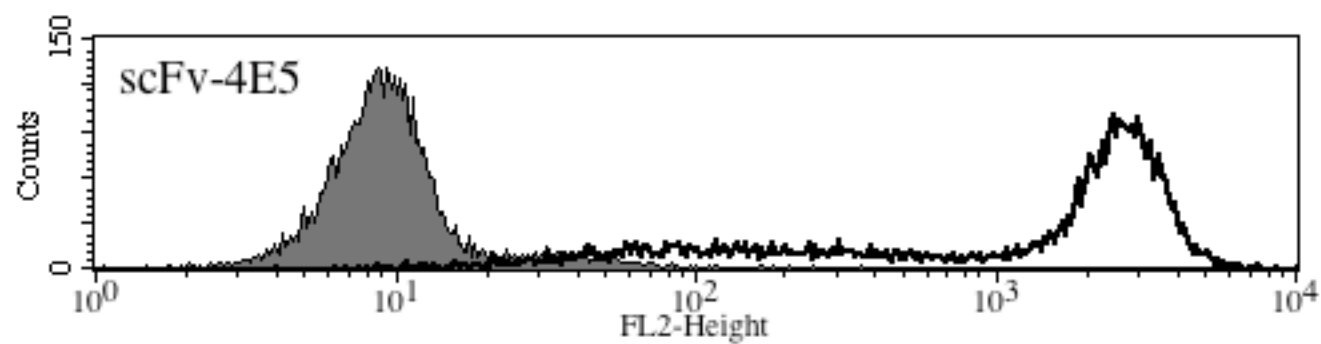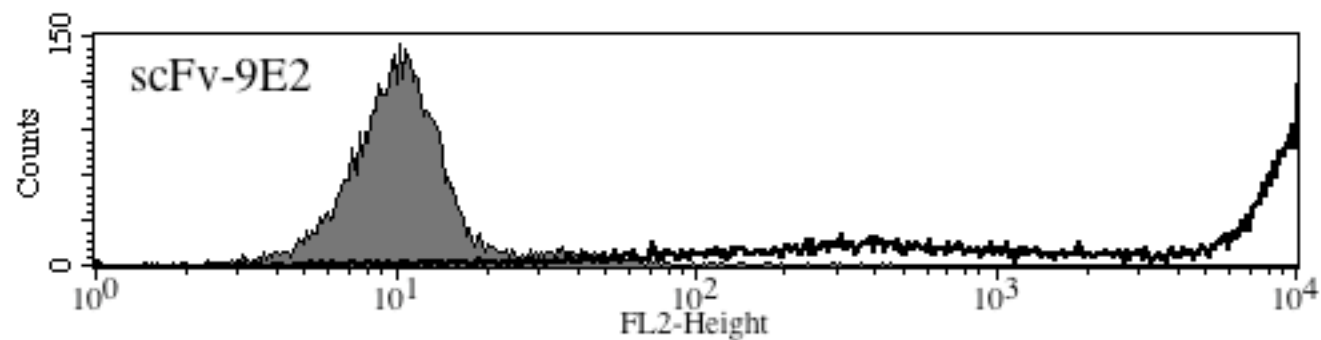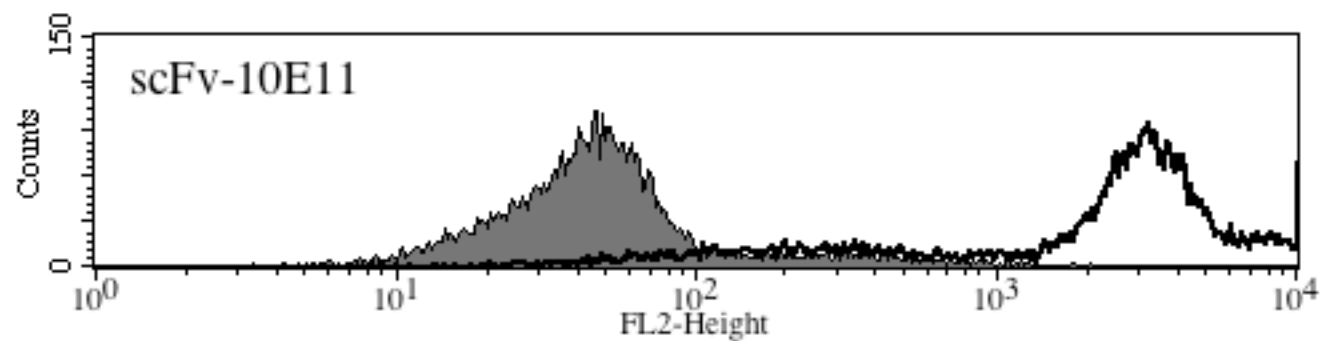

| Key | Cells/Plasmid |
|-----|---------------|
| ■   | 293/vector    |
| —   | 293/CD200     |

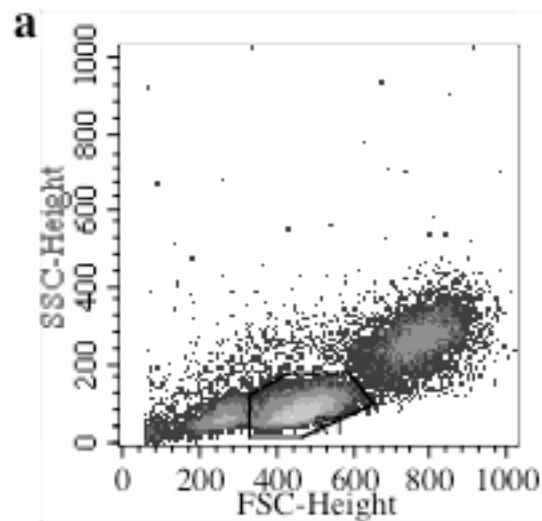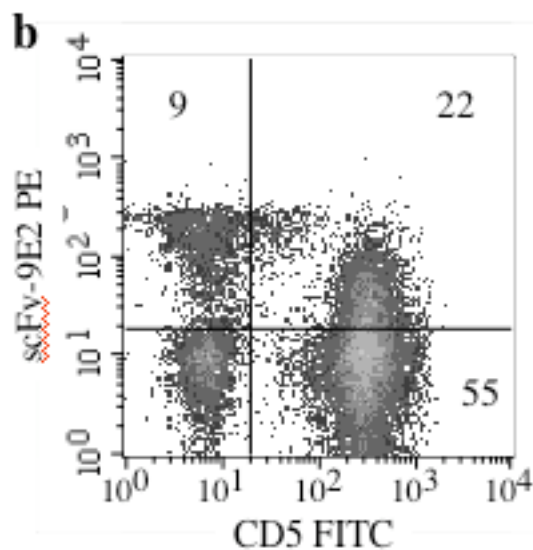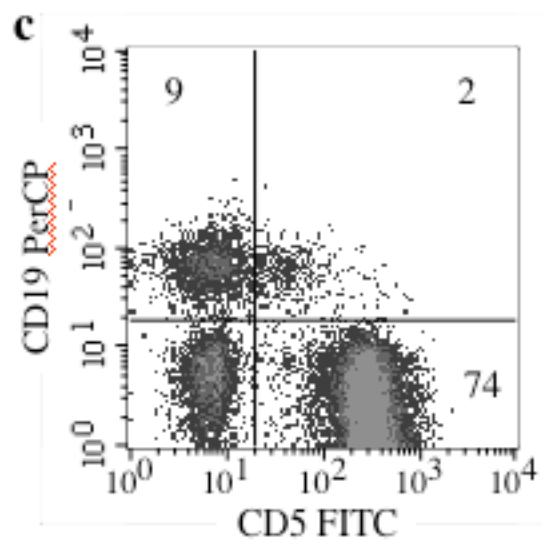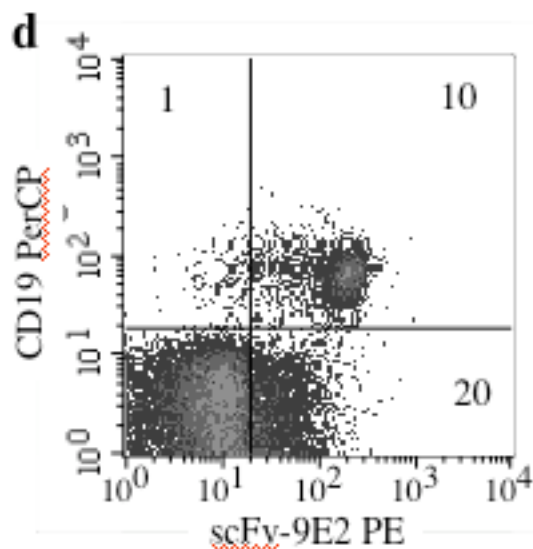

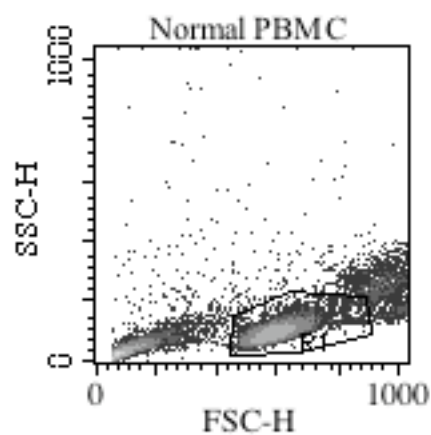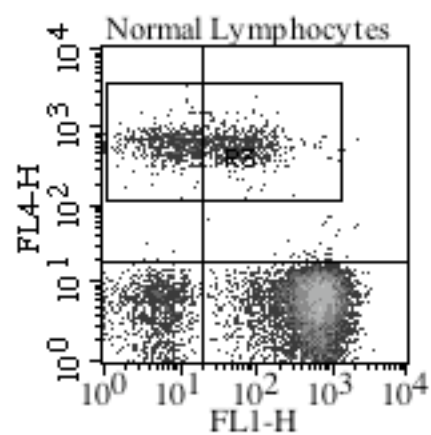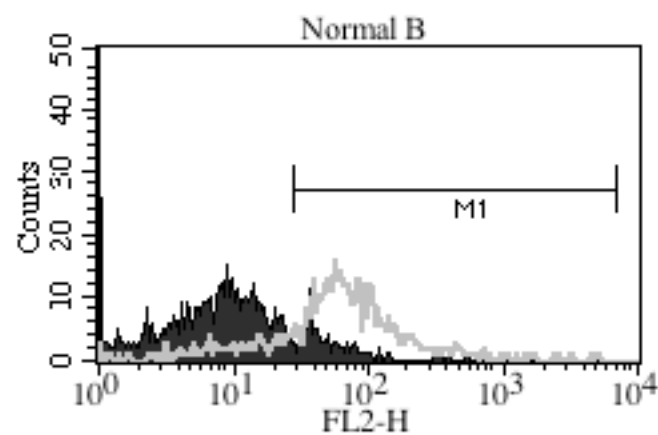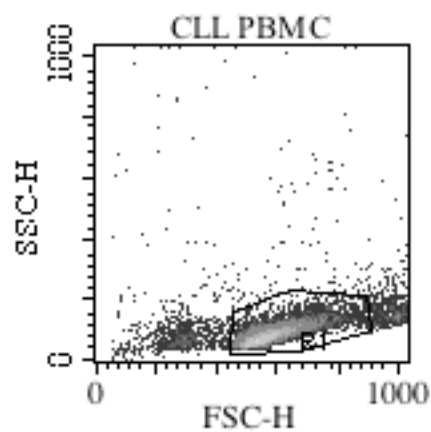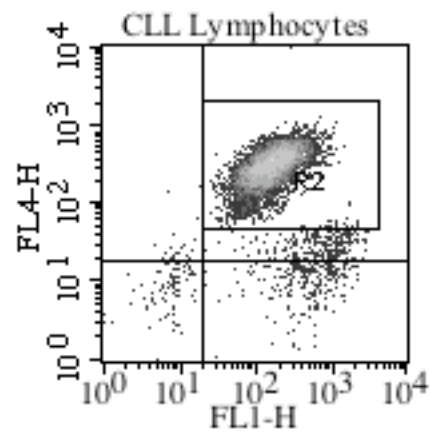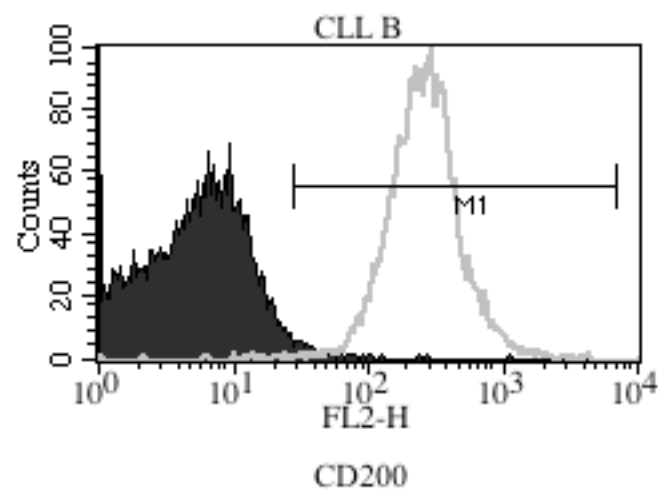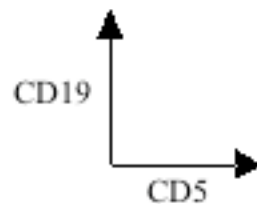

Supplement: pnas_0510081103_2.pdf [file pnas_0510081103_2.pdf]

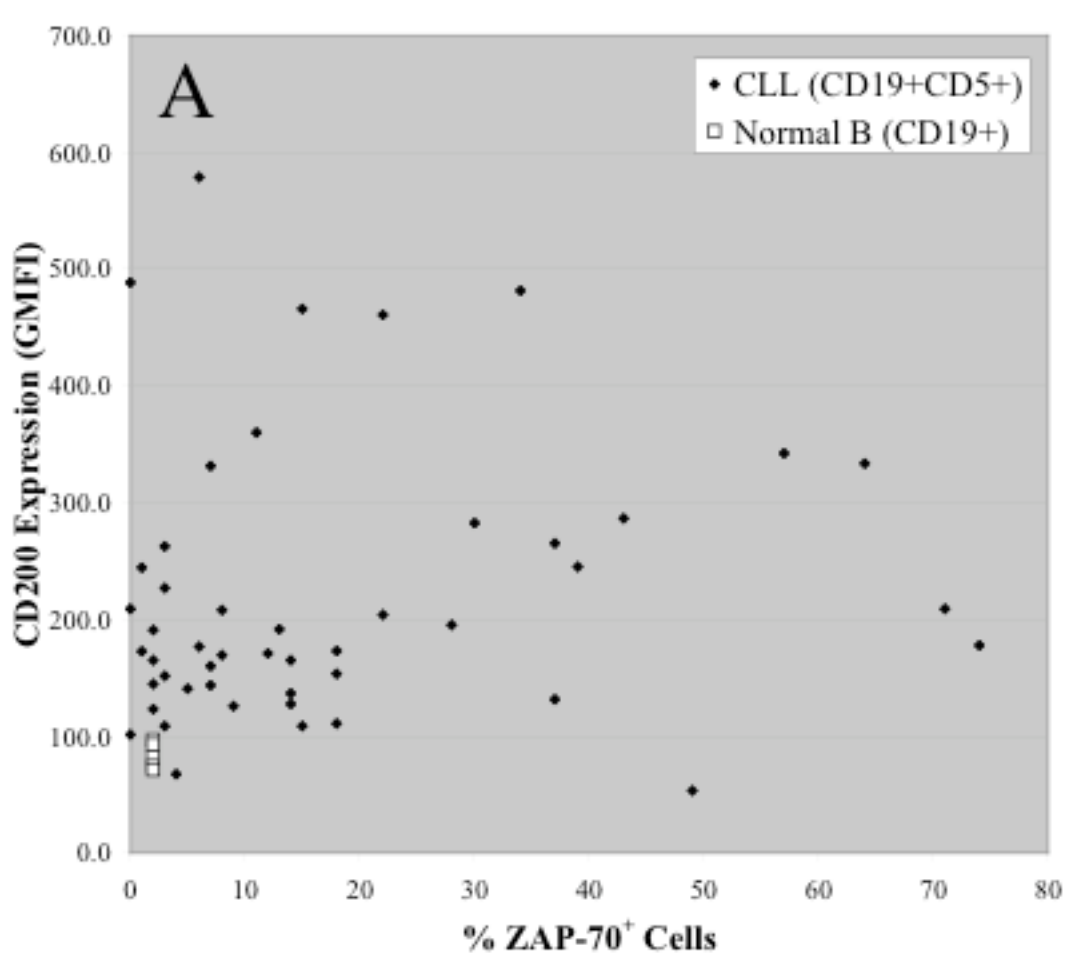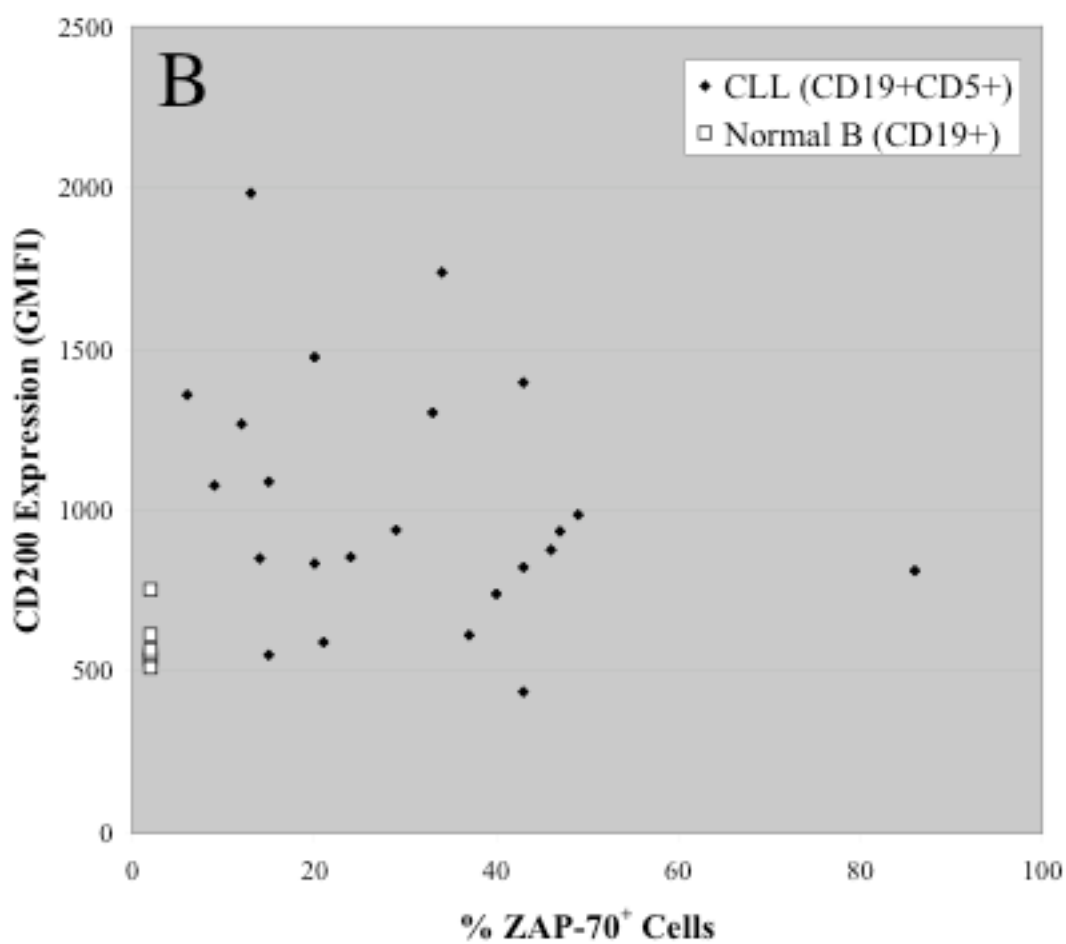

Supplement: pnas_0510081103_3.pdf [file pnas_0510081103_3.pdf]

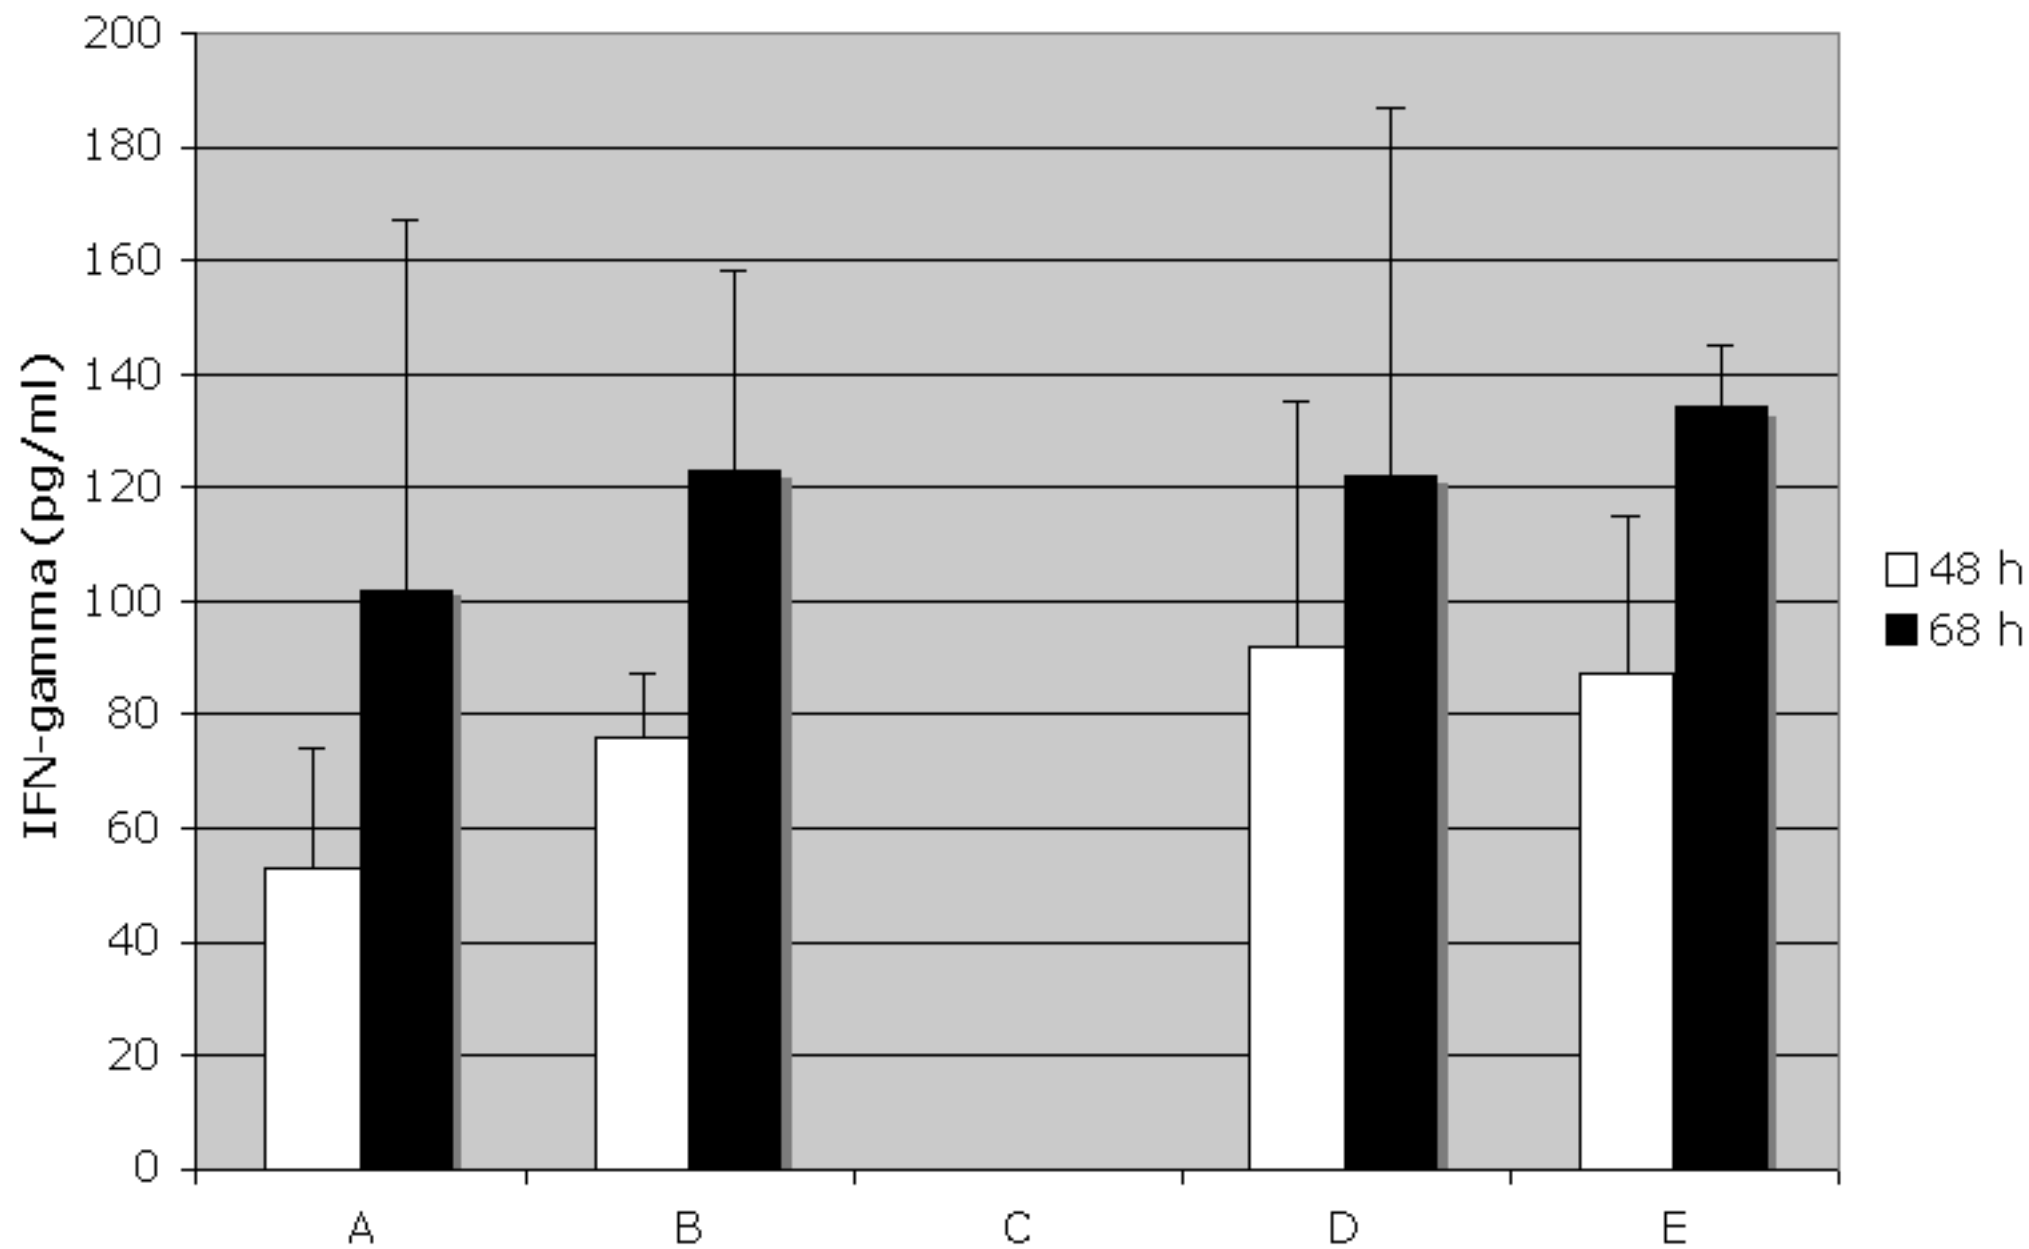

Supplement: pnas_0510081103_4.pdf [file pnas_0510081103_4.pdf]

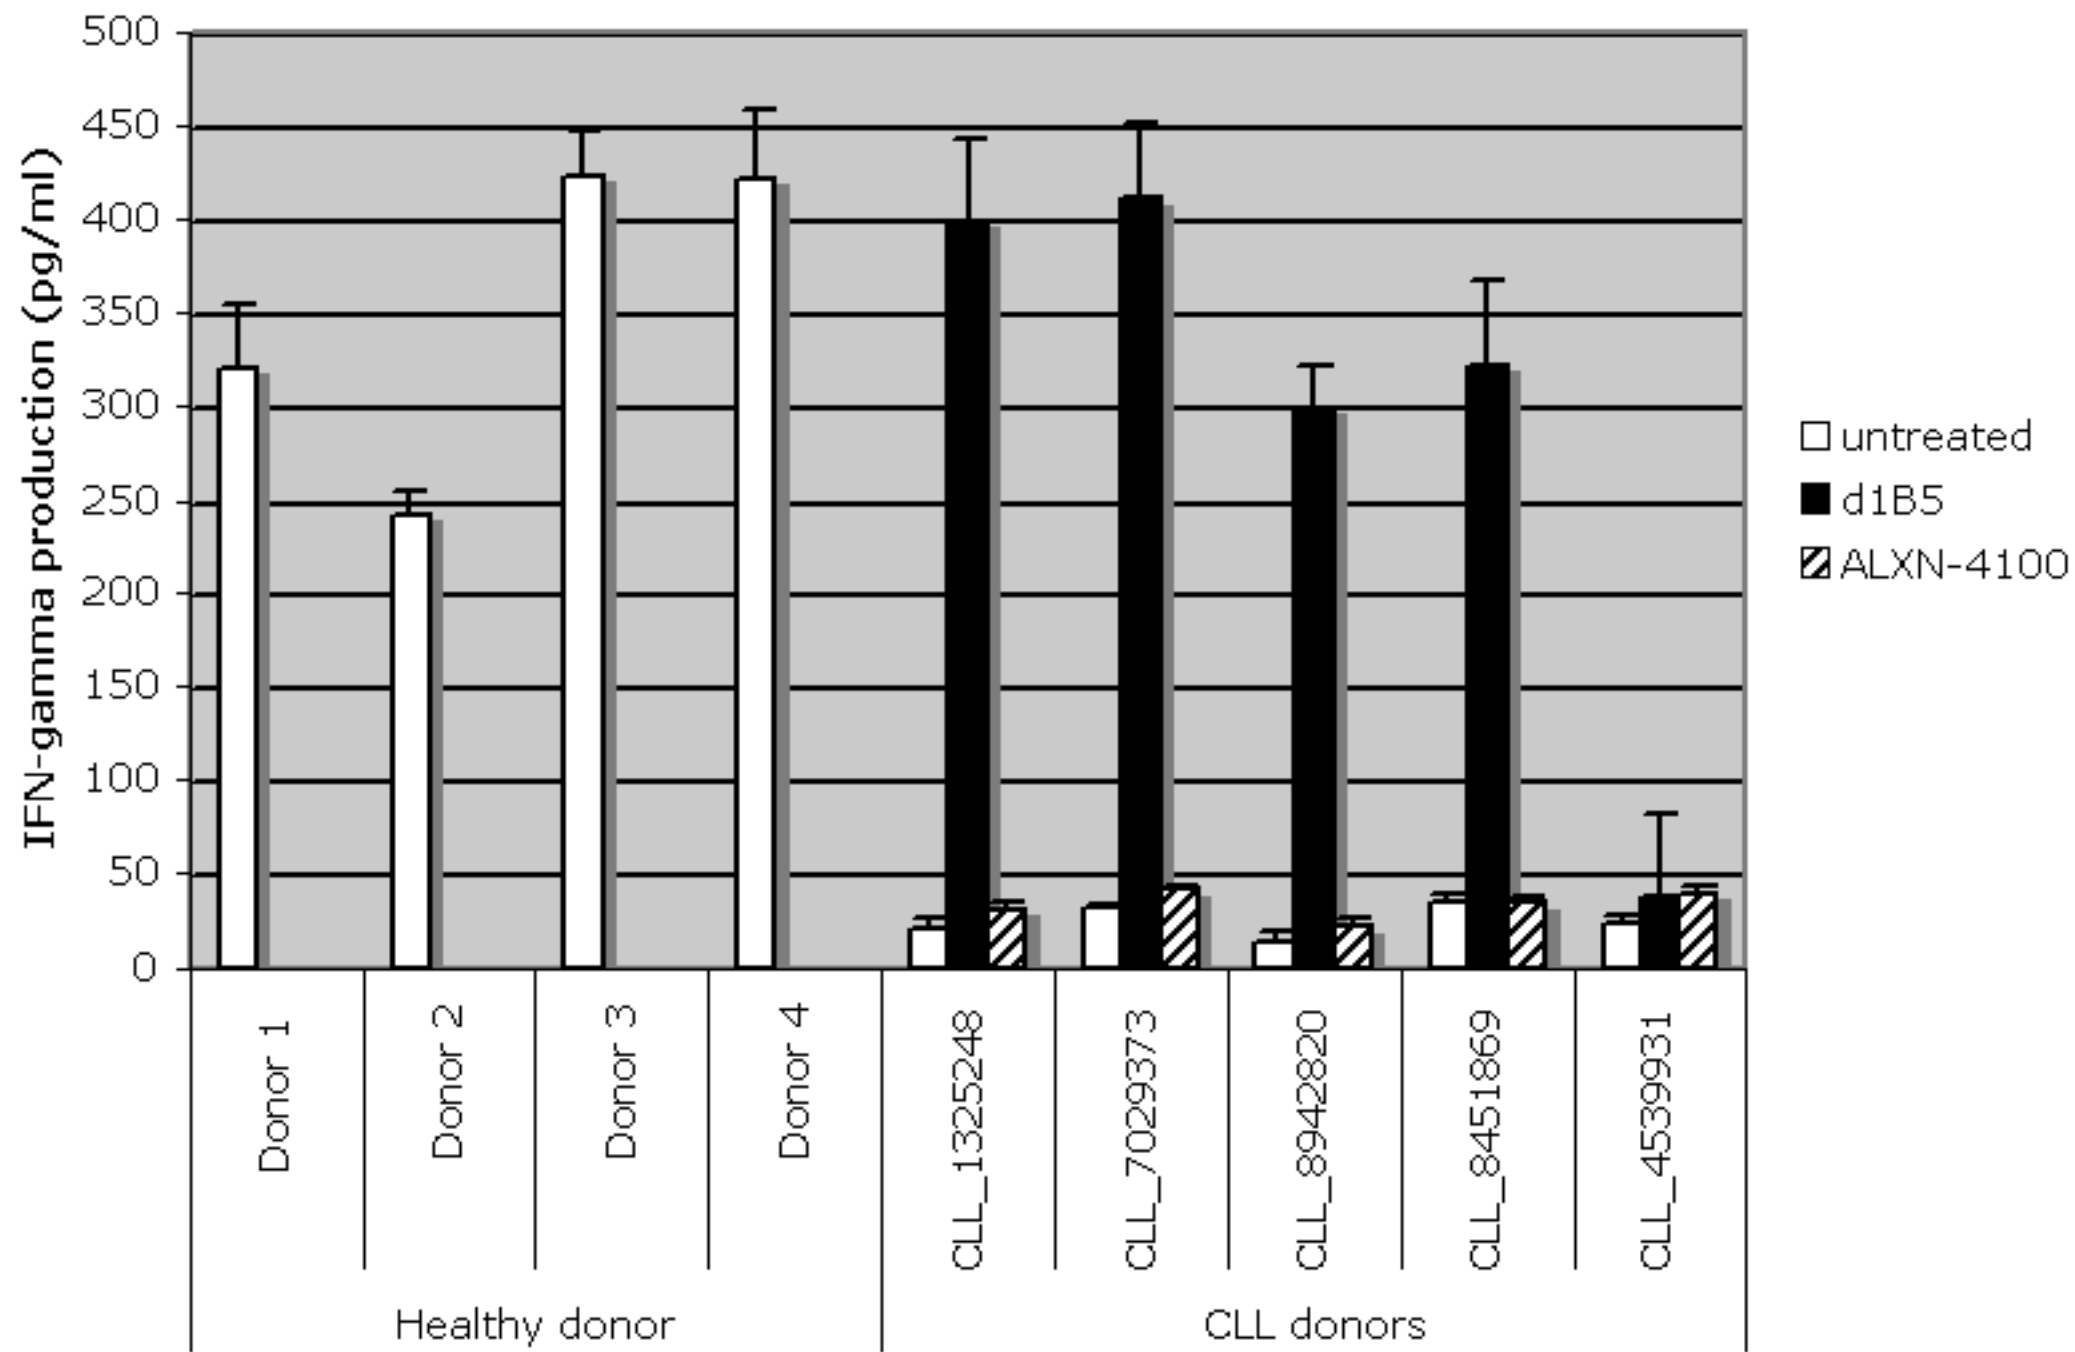

Supplement: pnas_0510081103_5.pdf [file pnas_0510081103_5.pdf]
